# Supplementary material
Source: publisher figshare collection journal article supplement (https://gsapubs.figshare.com/ndownloader/files/23708723)
Supplement: Supplementary file 1 [file 23708723]

## Sheet: Fujian sub-basin
Table S6: Paleocurrent data from the Fujian sub-basin
Fujian sub-basin
Changting, Lintian, Cambrian, 25°44′54.17″N, 116°32′57.91″E, n=20
Horizontal bedding		Uncorrected orientaton		Corrected orientaton		Oriented structure
Dip Azimuth	Dip	Dip Azimuth	Dip	Dip Azimuth	Dip
74	27	94	42	303.083	18.6292	Cross bedding
		109	34	342.893	18.8026
		104	45	316.815	24.763
		111	48	324.074	30.0437
78	28	89	49	282.825	22.0173	Cross bedding
		71	46	240.591	18.461
		85	49	274.014	21.4183
82	21	105	30	322.71	13.2338	Cross bedding
		99	24	336.542	7.13306
		78	29	247.871	8.17239
		109	26	342.076	11.7425	Cross bedding
		81	24	254.192	3.02421
		70	30	225.463	10.3359
85	31	76	40	229.457	10.387	Cross bedding
		97	36	325.046	8.27874
		100	39	321.099	11.6997
		98	38	319.216	10.1274
81	43	87	46	319.384	5.16343	Cross bedding
		84	47	290.887	4.52683
		90	46	331.4	6.97956
Changting, Zhangdi, Tonian, 25°58′10.48″N, 116°23′17.57″E, n=11
Horizontal bedding		Uncorrected orientaton		Corrected orientaton		Oriented structure
Dip Azimuth	Dip	Dip Azimuth	Dip	Dip Azimuth	Dip
79	41	86	61	279.07	20.7046	Cross bedding
		65	54	211.124	16.5434
		87	62	281.18	21.8836
		85	59	277.44	18.5627
		80	43	278.128	2.10891
		79	42	259	1
		87	46	311.911	7.43074
		84	54	278.173	13.5048
		85	49	290.852	9.04846
		110	64	328.044	33.2505
		79	71	259	30
Changting, Zhangdi, Tonian, 25°57′39.71″N, 116°23′23.51″E, n=6
Horizontal bedding		Uncorrected orientaton		Corrected orientaton		Oriented structure
Dip Azimuth	Dip	Dip Azimuth	Dip	Dip Azimuth	Dip
74	65	70	75	230.055	10.6807	Cross bedding
		82	75	297.639	12.5021
		85	77	304.25	15.862
		99	71	349.961	23.9028
		80	74	290.978	10.6061
		75	66	297.095	1.35203
Ruijin, Kaifengcun, early Ediacaran, 25°57′47.26″N, 115°57′56.14″E, n=4
Horizontal bedding		Uncorrected orientaton		Corrected orientaton		Oriented structure
Dip Azimuth	Dip	Dip Azimuth	Dip	Dip Azimuth	Dip
276	41	260	21	289.602	21.4738	Ripple bedding
		290	1	275.714	40.0303
		267	13	279.535	28.2209
		286	34	240.92	9.25844
Ruijin, Xianrengang, early Cambrian, 25°51′44.67″N,116°4′11.27″E, n=13
Horizontal bedding		Uncorrected orientaton		Corrected orientaton		Oriented structure
Dip Azimuth	Dip	Dip Azimuth	Dip	Dip Azimuth	Dip
337	21	335	1	337.096	20.0006	Flute casts
		359	14	304.723	9.51817
		350	14	314.485	7.97689
336	26	170	63	343.91	88.3351	Cross bedding
		150	51	332.697	76.8902
		150	49	332.72	74.8925
		134	60	323.497	84.4105
		175	6	339.254	31.7291
347	58	340	39	357.865	19.6881	Cross bedding
		343	39	353.348	19.2275
		334	32	358.431	27.4671
		342	39	354.887	19.3542
		340	29	352.169	29.3601

## Sheet: Jiangxi sub-basin
Table S6: Paleocurrent data from the Jiangxi sub-basin
Jiangxi sub-basin
Yudu, Caojikeng, early Cambrian, 25°53′2.79″N, 115°50′29.64″E, n=23
Horizontal bedding		Uncorrected orientaton		Corrected orientaton		Oriented structure
Dip Azimuth	Dip	Dip Azimuth	Dip	Dip Azimuth	Dip
287	55	208	41	315.811	57.6272	Cross bedding
	55	192	34	306.966	64.1769
	55	198	25	303.65	58.2726
	55	220	44	322.575	50.5849
	55	235	33	315.28	40.9122
294	42	220	46	342.289	49.5409	Cross bedding
	42	221	54	348.23	53.4816
	42	212	66	346.051	67.211
	42	205	43	331.678	56.5324
308	63	189	59	317.126	97.8423	Cross bedding
293	43	191	43	323.087	64.0126	Cross bedding
	43	191	34	319.283	58.1951
	43	201	41	327.141	57.5649
240	44	138	46	270.277	66.6839	Cross bedding
	44	143	49	273.956	65.9184
	44	147	56	278.636	68.1542
345	27	170	51	347.681	77.9214	Cross bedding
	27	141	32	333.633	57.5993
	27	184	46	355.056	71.9309
293	58	210	44	319.239	63.0646	Cross bedding
	58	220	67	335.735	64.1962
315	50	350	44	260.635	26.0664	Cross bedding
	50	345	52	240.636	23.2898
Chongyi, Shangyangmeitang, late Cambrian, 25°42′47.51″N, 114°14′14.84″E, n=13
Horizontal bedding		Uncorrected orientaton		Corrected orientaton		Oriented structure
Dip Azimuth	Dip	Dip Azimuth	Dip	Dip Azimuth	Dip
41	29	118	26	356.862	33.4974	Cross bedding
	29	121	42	343.411	45.0653
	29	129	59	342.18	62.292
	29	124	35	350.712	41.3806
40	26	52	30	281.424	6.8919	Cross bedding
	26	36	30	192.605	4.41687
	26	75	37	299.696	20.9462
	26	70	44	281.964	24.4589
	26	60	27	314.703	8.94224
	26	57	32	283.702	10.143
17	55	120	39	357.721	70.7441	Cross bedding
	55	115	41	355.319	69.017
	55	120	44	356.365	73.4655
Chongyi, Shangyangmeitang, late Cambrian, 25°41′30.27″N, 114°15′14.6″E, n=8
Horizontal bedding		Uncorrected orientaton		Corrected orientaton		Oriented structure
Dip Azimuth	Dip	Dip Azimuth	Dip	Dip Azimuth	Dip
5	39	143	48	348.309	80.0691	Cross bedding
	39	139	71	346.299	99.2261
	39	146	61	349.363	92.9225
	39	135	75	344.406	1
	39	127	71	339.326	93.5722
	39	109	42	332.962	61.5977
	39	116	53	333.838	73.2867
	39	120	62	335.116	82.5294
Chongyi, Huashancun, middle Cambrian, 25°39′30.04″N, 114°05′28.84″E, n=12
Horizontal bedding		Uncorrected orientaton		Corrected orientaton		Oriented structure
Dip Azimuth	Dip	Dip Azimuth	Dip	Dip Azimuth	Dip
39	46	71	79	284.983	42.9983	Cross bedding
		63	86	267.329	45.2507
		55	88	251.483	44.3325
		93	78	317.531	56.082
		93	84	314.986	60.4546
		93	76	318.508	54.6682
		92	87	312.567	62.0519
		111	89	335.727	76.445
		107	86	331.692	71.5021
		103	76	330.246	61.7042
		81	78	301.262	48.1395
		97	71	325.871	54.0851

## Sheet: Guangdong sub-basin
Table S6: Paleocurrent data from the Guangdong sub-basin
Guangdong sub-basin
Renhua, Zhoutian, middle Cambrian, 25°1′21.86″N, 113°47′58.76″E, n=20
Horizontal bedding		Uncorrected orientaton		Corrected orientaton		Oriented structure
Dip Azimuth	Dip	Dip Azimuth	Dip	Dip Azimuth	Dip
326	49	320	24	330.667	25.227	Cross bedding
	49	331	28	320.527	21.2145
	49	283	19	342.08	36.8683
298	90	277	86	356.7	21.3606	Cross bedding
	90	274	78	338.969	26.6731
	90	294	81	318.085	9.84216
	90	286	83	346.172	13.8665
307	90	312	84	272.071	7.80439	Cross bedding
	90	307	86	307	4
	90	327	81	260.258	21.8558
	90	318	89	233.131	11.0448
129	71	110	69	196.943	17.955	Cross bedding
	71	125	78	276.672	7.98963
	71	131	74	343.153	3.55488
292	64	305	33	282.811	32.3687	Cross bedding
	64	288	57	315.454	7.81598
279	74	290	59	253.703	18.0498	Cross bedding
	74	295	34	271.587	41.8219
	74	285	50	271.012	24.5621
	74	291	66	234.169	13.8134
Ruyuan, Youxidongzhen, early Cambrian, 24°56′37.74″N, 113°21′41.37″E, gravel imbrications, n=12
Horizontal bedding		Uncorrected orientaton		Corrected orientaton		Oriented structure
Dip Azimuth	Dip	Dip Azimuth	Dip	Dip Azimuth	Dip
276	59	317	39	244.621	36.1598	Gravel imbrications,
		43	26	267.797	76.3036
		43	65	267.99	104.469
		5	17	265.965	60.2044
		13	14	268.126	61.6753
		11	17	266.425	61.9208
		355	39	251.822	59.7888
		348	47	244.479	56.977
		343	27	257.68	52.3415
		310	35	250.885	33.9534
		309	59	210.326	28.1804
		46	76	272.048	114.206
Ruyuan, Changzhen, early Cambrian, 24°56′52.64″N, 113°20′40.041″E, n=9
Horizontal bedding		Uncorrected orientaton		Corrected orientaton		Oriented structure
Dip Azimuth	Dip	Dip Azimuth	Dip	Dip Azimuth	Dip
305	54	50	48	283.563	76.2492	Cross bedding
		32	72	267.952	77.1791
		39	39	281.856	65.0846
		5	29	280.611	44.749
		46	66	278.939	84.373
		46	58	279.845	79.5972
		65	49	289.66	85.3922
		234	44	339.965	52.7148
		34	54	273.989	69.0892

## Sheet: Guangxi sub-basin
Table S6: Paleocurrent data from the Guangxi sub-basin
Guangxi sub-basin
Hezhou, Yuewan, Cambrian, 24°28′20.6″N, 111°48′35.15″E, n=21
Horizontal bedding		Uncorrected orientaton		Corrected orientaton		Oriented structure
Dip Azimuth	Dip	Dip Azimuth	Dip	Dip Azimuth	Dip
275	69	264	39	284.104	31.2147	Cross bedding
	69	264	52	296.297	19.4748
	69	269	47	283.732	22.5652
	69	286	2	274.845	67.0373
	69	286	4	274.672	65.0756
	69	274	56	278.144	13.03
	69	252	59	321.632	22.8989
	69	252	74	358.436	22.3536
288	39	288	19	288	20	Cross bedding
	39	267	34	343.895	13.3889
	39	284	23	293.095	16.124
259	62	254	74	53.7718	12.8597	Cross bedding
	62	254	81	60.7219	19.5756
	62	257	68	60.6047	6.26742
	62	246	71	15.5124	14.9189
	62	256	63	7.2841	2.84261
	62	251	71	33.3419	11.6033
	62	250	69	22.3187	10.7662
	62	245	69	6.5724	14.5198
	62	258	69	70.7964	7.05878
	62	257	63	16.8686	2.0364
Zhaoping, Zouma, early Cambrian, 24°16′46.74″N, 110°59′11.4″E, n=22
Horizontal bedding		Uncorrected orientaton		Corrected orientaton		Oriented structure
Dip Azimuth	Dip	Dip Azimuth	Dip	Dip Azimuth	Dip
357	70	13	50	333.892	24.2437	Cross bedding
		346	63	43.5447	12.2683
		344	42	9.0846	29.9074
		354	47	1.1899	23.1377
		14	65	298.255	16.4673
		3	56	340.662	14.9773
359	68	6	49	346.609	19.8975	Cross bedding
		7	36	353.131	32.5689
		358	50	0.9984	18.0201
		347	44	13.177	25.9114
		356	49	4.4988	19.1681
		354	53	11.4743	15.6116
		358	47	0.586	21.0165
		11	41	347.278	28.6322
		347	45	14.1189	25.0176
		15	41	344.092	29.8372
		13	45	341.86	25.7062
		0	59	354.092	9.04423
		2	67	291.261	2.94643
		0	61	352.432	7.05783
		19	70	279.332	18.7648
		5	66	293.715	5.87323
Zhaoping, Bijiang, late Ediacaran, 24°11′52.55″N, 110°55′49.02″E, n=7
Horizontal bedding		Uncorrected orientaton		Corrected orientaton		Oriented structure
Dip Azimuth	Dip	Dip Azimuth	Dip	Dip Azimuth	Dip
329	70	29	74	285	57	Cross bedding
	70	13	86	259	46
	70	19	65	285	46
	70	25	46	304	52
297	59	47	73	281	98	Cross bedding
	59	53	60	287	94
	59	56	49	285	89
Jinxiu, Nengshuai, late Ediacaran, 24°5′42.19″N, 110°13′11.04″E, n=14
Horizontal bedding		Uncorrected orientaton		Corrected orientaton		Oriented structure
Dip Azimuth	Dip	Dip Azimuth	Dip	Dip Azimuth	Dip
203	31	182	34	295.615	11.6213	Cross bedding
	31	182	51	335.083	24.0616
	31	140	31	257.712	31.2222
	31	146	41	275.069	33.8042
	31	167	41	296.311	23.0336
	31	125	83	273.979	77.8339
	31	295	27	166.792	40.9238
260	64	150	37	271.092	80.4971	Cross bedding
	64	154	30	270.658	75.1808
	64	127	14	263.834	73.9154
	64	127	24	265.32	81.3063
	64	110	37	263.091	96.7964
	64	133	21	265.687	77.5604
	64	125	9	262.612	70.5154
Jinxiu, Nengshuai, late Cryogenian, 24°5′42.19″N, 110°13′11.04″E, n=12
Horizontal bedding		Uncorrected orientaton		Corrected orientaton		Oriented structure
Dip Azimuth	Dip	Dip Azimuth	Dip	Dip Azimuth	Dip
132	59	124	66	260.398	9.96109	Cross bedding
	59	125	89	293.202	30.7241
	59	126	69	278.932	11.3556
	59	124	81	286.393	23.2277
132	50	129	51	243.313	2.52145	Cross bedding
	50	124	63	278.971	14.5958
	50	124	73	288.819	24.0239
	50	130	69	305.308	19.0765
	50	132	61	312	11
	50	131	58	305.515	8.04063
	50	117	57	241.465	13.9147
	50	128	70	299.136	20.2917
Jinxiu, Laoshan, middle Cambrian, 24°8′38.81″N, 110°14′21.31″E, n=22
Horizontal bedding		Uncorrected orientaton		Corrected orientaton		Oriented structure
Dip Azimuth	Dip	Dip Azimuth	Dip	Dip Azimuth	Dip
151	34	150	39	323.616	5.03511	Cross bedding
	34	135	49	285.554	18.2723
	34	141	48	299.587	15.4244
	34	136	41	269.271	11.4652
	34	151	55	331	21
	34	135	64	298.168	32.161
	34	130	51	277.598	21.9607
	34	134	40	261.01	11.8144
	34	140	47	295.298	14.7926
	34	123	34	224.679	15.5497
	34	129	45	265.352	17.6673
	34	110	56	250.893	35.5637
	34	114	52	252.347	30.4213
	34	142	41	287.455	8.87419
	34	143	41	291.293	8.51549
	34	146	52	317.075	18.3084
	34	143	44	299.332	11.1787
	34	142	67	312.919	33.6608
	34	102	59	243.028	42.145
	34	143	59	312.633	25.6251
59	51	93	58	339.133	28.3731	Cross bedding
	51	79	66	302.727	22.6149
